# Supplementary material
Source: HighWire-hosted journal article supplement (https://www.cmajopen.ca/highwire/filestream/84476/field_highwire_adjunct_files/0/2020-0311-1-at.pdf)
Supplement: 2020-0311-1-at.pdf [file 2020-0311-1-at.pdf]

**Appendix 1 (as supplied by the authors): Supplemental material**

**Supplemental Table S1. Billing Codes for Virtual Care**

| Time Period                    | Billing Codes                      | Modality                    |
|--------------------------------|------------------------------------|-----------------------------|
| January 1, 2012- June 30, 2020 | B100, B200, B099                   | Video-visit                 |
| April 1, 2020- June 30, 2020   | B103, B203, B209                   | Video-visit                 |
| March 14, 2020- June 30, 2020  | K080, K081, K082, K083, H409, H410 | All telemedicine modalities |

**Supplemental Table S2. Inclusion Criteria for Chronic Disease Patient Cohorts**

| Chronic Disease        | Inclusion Criteria                                                                                                                                                                                                                                                                                                                                                                                                                                                                                                                                                                                                                                                                                                                                                                                                        |
|------------------------|---------------------------------------------------------------------------------------------------------------------------------------------------------------------------------------------------------------------------------------------------------------------------------------------------------------------------------------------------------------------------------------------------------------------------------------------------------------------------------------------------------------------------------------------------------------------------------------------------------------------------------------------------------------------------------------------------------------------------------------------------------------------------------------------------------------------------|
| Serious mental illness | <p>Patients with <b>serious mental illness</b> that affects functioning, characterized by at least 2 outpatient or 1 inpatient claims with the corresponding ICD 9 or 10 codes or DXCODES within 12 months prior to year of interest [NACRS, OHIP, DAD]:</p> <p><u>Schizophrenia and psychotic disorders:</u><br/> DAD/NACRS:<br/> ICD-9=295, 297<br/> ICD-10= F20.0, F20.1, F20.2, F20.5, F20.9, F20.81, F20.89, F22, F23, F24, F25.9</p> <p>OHIP DXCODES: 295, 297, 298</p> <p><u>Bipolar disorder:</u><br/> DAD/NACRS:<br/> ICD-9=296.0, 296.1, 296.4-296.6, 296.7, 296.8, 296.9, 301.11, 301.13<br/> ICD-10=F30.1, F30.2, F30.3, F30.4, F30.8, F31.1, F31.2, F31.3, F31.4, F31.5, F31.6, F31.73, F31.74, F31.75, F31.76, F31.77, F31.78, F31.81, F31.9, F32.8, F34.0, F34.8, F39, F60.89</p> <p>OHIP DXCODES: 296</p> |
| COPD                   | Record in the ICES COPD database any time prior to year of interest                                                                                                                                                                                                                                                                                                                                                                                                                                                                                                                                                                                                                                                                                                                                                       |
| Heart failure          | Record in ICES CHF database any time prior to year of interest                                                                                                                                                                                                                                                                                                                                                                                                                                                                                                                                                                                                                                                                                                                                                            |
| Asthma                 | Record in ICES ASTHMA database any time prior to year of interest                                                                                                                                                                                                                                                                                                                                                                                                                                                                                                                                                                                                                                                                                                                                                         |
| Hypertension           | Record in the ICES HYPHER database any time prior to year of interest                                                                                                                                                                                                                                                                                                                                                                                                                                                                                                                                                                                                                                                                                                                                                     |
| Angina                 | <p>At least one ED visit within 12 months prior to year of interest with any of the following codes [NACRS, OHIP]:</p> <p>ICD-9: 411.1, 413.0, 413.1, 413.9, 786.51, 786.52<br/> ICD-10: R07.1–R07.4, I20.0, I20.1, I20.8, I20.88, or I20.9</p>                                                                                                                                                                                                                                                                                                                                                                                                                                                                                                                                                                           |
| Diabetes               | Record in the ICES ODD database any time prior to year of interest                                                                                                                                                                                                                                                                                                                                                                                                                                                                                                                                                                                                                                                                                                                                                        |

**Supplemental Table S3. Baseline physician characteristics by non/low user vs. high user of virtual care<sup>a</sup>**

| <b>Variable</b>                                | <b>Non/low user</b> | <b>High user</b> | <b>P-value</b> |
|------------------------------------------------|---------------------|------------------|----------------|
| <b>Age, median(IQR)</b>                        | 50 (43-60)          | 53 (45-62)       | <0.001         |
| <b>Male, n(%)</b>                              | 2,787 (58.5%)       | 13,533 (52.7%)   | <0.001         |
| <b>Medical specialty, n(%)</b>                 |                     |                  |                |
| <b>Family/general practice</b>                 | 1,539 (32.3%)       | 12,780 (49.7%)   | <0.001         |
| <b>Psychiatrist</b>                            | 3,105 (65.1%)       | 10,878 (42.3%)   |                |
| <b>Other specialist</b>                        | 123 (2.6%)          | 2,033 (7.9%)     |                |
| <b>&gt;50% FFS, n(%)</b>                       | 3,046 (63.9%)       | 16,082 (62.6%)   | <0.001         |
| <b>Non-FFS group, n(%)</b>                     | 2,197 (46.1%)       | 15,421 (60.0%)   | <0.001         |
| <b>Full-time Patient enrolment model, n(%)</b> | 189 (4.0%)          | 8,539 (33.2%)    | <0.001         |
| <b>Years since graduation, median(IQR)</b>     | 21 (12-32)          | 23 (13-34)       | <0.001         |
| <b>Region of practice</b>                      |                     |                  | <0.001         |
| <b>Central</b>                                 | 1,045 (21.9%)       | 7,077 (27.5%)    |                |
| <b>East</b>                                    | 1,145 (24.0%)       | 5,864 (22.8%)    |                |
| <b>North</b>                                   | 324 (6.8%)          | 1,200 (4.7%)     |                |
| <b>Toronto</b>                                 | 540 (11.3%)         | 3,772 (14.7%)    |                |
| <b>West</b>                                    | 1,148 (24.1%)       | 6,059 (23.6%)    |                |
| <b>Level of rurality (RIO score)</b>           |                     |                  | <0.001         |
| <b>Urban (&lt;40)</b>                          | 3,999 (83.9%)       | 23,047 (89.7%)   |                |
| <b>Rural (&gt;=40)</b>                         | 184 (3.9%)          | 914 (3.6%)       |                |

<sup>a</sup>Non/low user defined as <2 virtual visits after March 14<sup>th</sup>, 2020; High user defined as 2+ virtual visits after March 14<sup>th</sup>, 2020

**Supplemental Table S4. Medical specialties of physicians who delivered at least one virtual visit in the first 6 months of 2020<sup>a</sup>**

| Medical Specialty       | N(%) with zero virtual visits (N=5,253) | N(%) with ≥1 virtual visits (N=26,267) | N(%) with x number of virtual visits <sup>b</sup> |                    |                     |                       |
|-------------------------|-----------------------------------------|----------------------------------------|---------------------------------------------------|--------------------|---------------------|-----------------------|
|                         |                                         |                                        | 1 visit (N=388)                                   | 2-4 visits (N=580) | 5-10 visits (N=695) | >10 visits (N=24,604) |
| Anaesthesia             | 550 (10.5%)                             | 811 (3.1%)                             | 53 (6.5%)                                         | 75 (9.2%)          | 91 (11.2%)          | 592 (73.0%)           |
| Cardiology              | 47 (0.9%)                               | 654 (2.5%)                             | 6-10 (0.9-1.5%)                                   | ≤5                 | 10 (1.5%)           | 633 (96.8%)           |
| Community Medicine      | ≤5                                      | 6 (0.0%)                               | 0 (0.0%)                                          | 0 (0.0%)           | 0 (0.0%)            | 6 (100.0%)            |
| Dermatology             | 23 (0.4%)                               | 227 (0.9%)                             | ≤5                                                | ≤5                 | ≤5                  | 220 (96.9%)           |
| Diagnostic Radiology    | 879 (16.7%)                             | 68 (0.3%)                              | 16 (23.5%)                                        | 17 (25.0%)         | 15 (22.1%)          | 20 (29.4%)            |
| Emergency               | 252 (4.8%)                              | 170 (0.6%)                             | 13 (7.6%)                                         | 25 (14.7%)         | 27 (15.9%)          | 105 (61.8%)           |
| Endocrinology           | ≤5                                      | 273 (1.0%)                             | 0 (0.0%)                                          | 0 (0.0%)           | 0 (0.0%)            | 273 (100.0%)          |
| Family/General Practice | 1,767 (33.6%)                           | 12,999 (49.5%)                         | 151 (1.2%)                                        | 202 (1.6%)         | 247 (1.9%)          | 12,399 (95.4%)        |
| Gastroenterology        | 12 (0.2%)                               | 299 (1.1%)                             | 0 (0.0%)                                          | ≤5                 | ≤5                  | 294 (98.3%)           |
| Genetics                | ≤5                                      | 41 (0.2%)                              | ≤5                                                | 0 (0.0%)           | ≤5                  | 38 (92.7%)            |
| Geriatrics              | 10 (0.2%)                               | 143 (0.5%)                             | ≤5                                                | ≤5                 | ≤5                  | 134 (93.7%)           |
| Haematology             | 11 (0.2%)                               | 215 (0.8%)                             | ≤5                                                | ≤5                 | ≤5                  | 207 (96.3%)           |
| Immunology              | ≤5                                      | 51 (0.2%)                              | 0 (0.0%)                                          | 0 (0.0%)           | ≤5                  | 46-50 (90.2-98.0%)    |
| Infectious Disease      | 14 (0.3%)                               | 160 (0.6%)                             | ≤5                                                | 6 (3.8%)           | ≤5                  | 145 (90.6%)           |
| Internal Medicine       | 442 (8.4%)                              | 1,313 (5.0%)                           | 52 (4.0%)                                         | 69 (5.3%)          | 70 (5.3%)           | 1,122 (85.5%)         |
| Nephrology              | 6 (0.1%)                                | 213 (0.8%)                             | ≤5                                                | ≤5                 | 0 (0.0%)            | 211 (99.1%)           |
| Neurology               | 25 (0.5%)                               | 443 (1.7%)                             | ≤5                                                | 7 (1.6%)           | 9 (2.0%)            | 422-426 (95.3-96.2%)  |
| Nuclear Medicine        | 25 (0.5%)                               | 10 (0.0%)                              | ≤5                                                | ≤5                 | ≤5                  | 6-7 (60.0-70.0%)      |
| OB/GYN                  | 70 (1.3%)                               | 876 (3.3%)                             | ≤5                                                | 17 (1.9%)          | 16 (1.8%)           | 838-842 (95.7-96.1%)  |

|                          |               |                 |              |              |              |                             |
|--------------------------|---------------|-----------------|--------------|--------------|--------------|-----------------------------|
| Oncology                 | 8 (0.2%)      | 245 (0.9%)      | 0 (0.0%)     | 0 (0.0%)     | <=5          | 240-244<br>(98.0-<br>99.6%) |
| Ophthalmology            | 86 (1.6%)     | 377 (1.4%)      | 12<br>(3.2%) | 9 (2.4%)     | 15<br>(4.0%) | 341 (90.5%)                 |
| Otolaryngology           | 27 (0.5%)     | 269 (1.0%)      | <=5          | <=5          | <=5          | 262 (97.4%)                 |
| Pathology                | 288<br>(5.5%) | 18 (0.1%)       | 0 (0.0%)     | <=5          | <=5          | 11-16<br>(88.9%)            |
| Pediatrics               | 190<br>(3.6%) | 1,370<br>(5.2%) | 21<br>(1.5%) | 48<br>(3.5%) | 60<br>(4.4%) | 1,241<br>(90.6%)            |
| Physical Medicine        | 31 (0.6%)     | 197 (0.7%)      | 7 (3.6%)     | <=5          | 7 (3.6%)     | 178-<br>182(90.4-<br>92.4%) |
| Psychiatry               | 147<br>(2.8%) | 2,069<br>(7.9%) | 11<br>(0.5%) | 37<br>(1.8%) | 47<br>(2.3%) | 1,974<br>(95.4%)            |
| Respiratory<br>Disease   | 13 (0.2%)     | 317 (1.2%)      | <=5          | <=5          | <=5          | 311 (98.1%)                 |
| Rheumatology             | <=5           | 231 (0.9%)      | 0 (0.0%)     | <=5          | <=5          | 228 (98.7%)                 |
| Surgery                  | 274<br>(5.2%) | 1,709<br>(6.5%) | 28<br>(1.6%) | 36<br>(2.1%) | 42<br>(2.5%) | 1,603<br>(93.8%)            |
| Therapeutic<br>Radiology | <=5           | 219 (0.8%)      | 0 (0.0%)     | 0 (0.0%)     | 0 (0.0%)     | 219<br>(100.0%)             |
| Urology                  | 28 (0.5%)     | 274 (1.0%)      | <=5          | <=5          | 8 (2.9%)     | 260-264<br>(94.9-<br>96.4%) |
| Missing                  | 13 (0.2%)     |                 |              |              |              |                             |

<sup>a</sup>Percentage ranges are provided due to suppression of small cells (n<6) to prevent risk of re-identification

<sup>b</sup>Denominator used to calculate percentages is total number of providers within each specialty with >=1 virtual visit



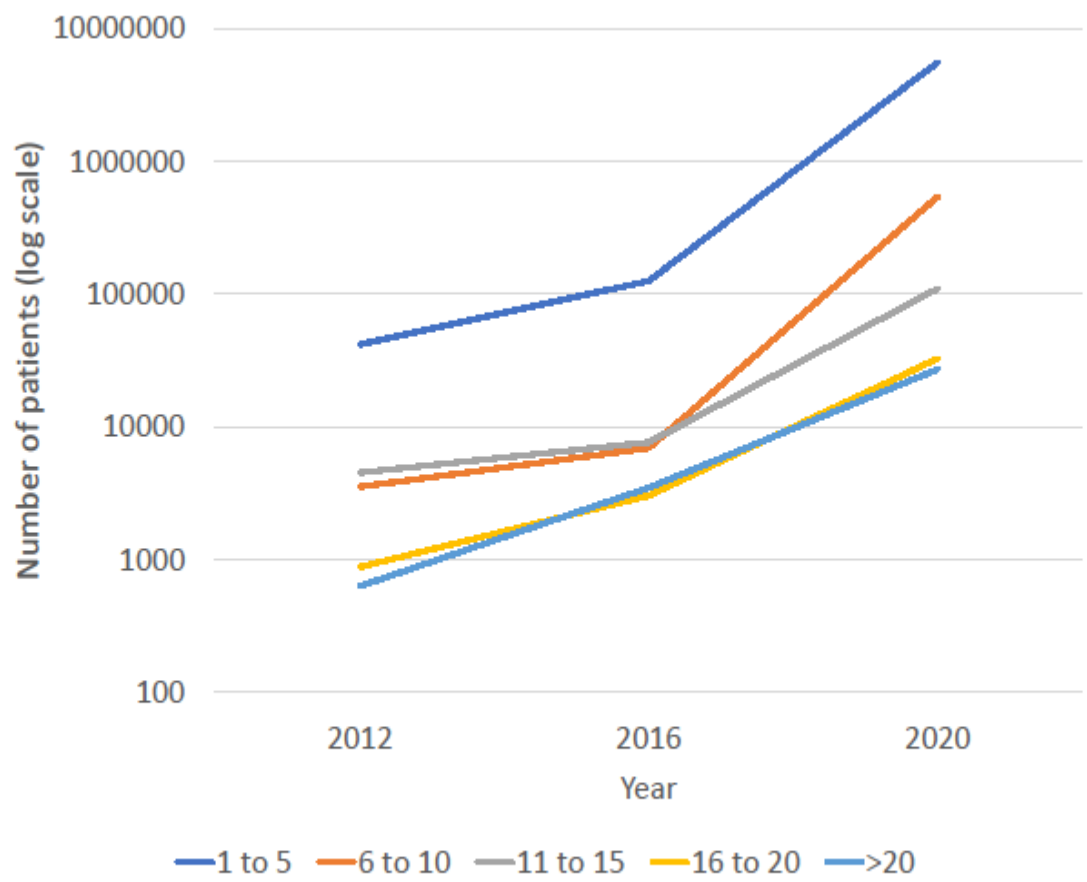

**Supplemental Figure S1. Distribution of number of virtual visits in total eligible Ontario patient population**
